# Supplementary material for: A sphingosine kinase inhibitor combined with temozolomide induces glioblastoma cell death through accumulation of dihydrosphingosine and dihydroceramide, endoplasmic reticulum stress and autophagy
Source: PubMed Central journal article supplement (PMC4540206; doi:10.1038/cddis.2014.384), 2014-09-25
Supplement: cddis2014384x2.pdf [file cddis2014384x2.pdf]

## Supplementary Information

A sphingosine kinase inhibitor combined with temozolomide induces glioblastoma cell death through accumulation of dihydrosphingosine and dihydroceramide, endoplasmic reticulum stress and autophagy

Johannes Noack, Judy Choi, Karsten Richter, Annette Kopp-Schneider, Anne Régnier-Vigouroux

### **Legend to Supplementary Figure 1.**

The overall LC3 level is increased after 48 hours of TMZ treatment. NCH82 cells were treated for 8, 16, 24, and 48 h with 500  $\mu$ M TMZ or control medium. Total LC3 level (LC3-I + LC3-II) at each time point was quantified and compared to its respective 14-3-3 level (internal control). The mean value of the total LC3/14-3-3 ratios for each condition is reported in the graphs. The blots shown are representative of three independent experiments, and the results are shown as the mean  $\pm$  SEM. \*:  $p < 0.05$  compared to all other time points of the TMZ-treated NCH82 cells.
